# Supplementary material
Source: publisher figshare collection journal article supplement (https://future-science-group.figshare.com/ndownloader/files/34448585)
Supplement: Supplementary file 1 [file 34448585]

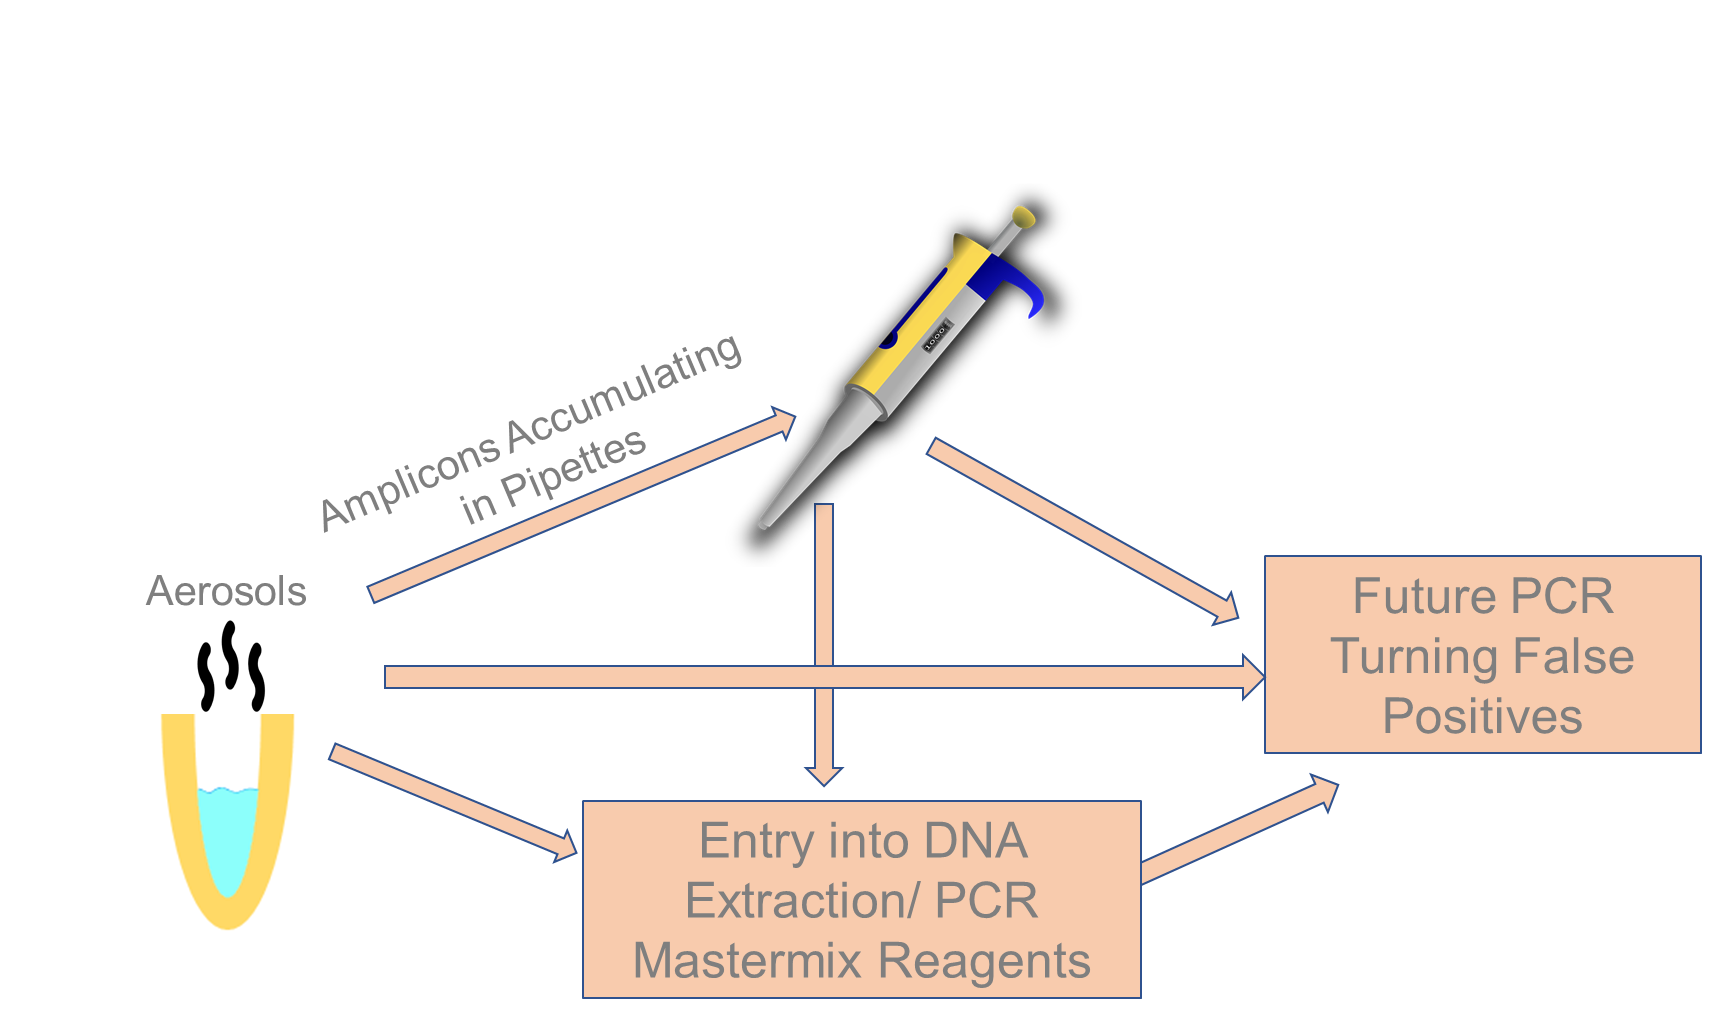


Figure 1: Routes of PCR carryover contamination include pipettes and aerosolization.


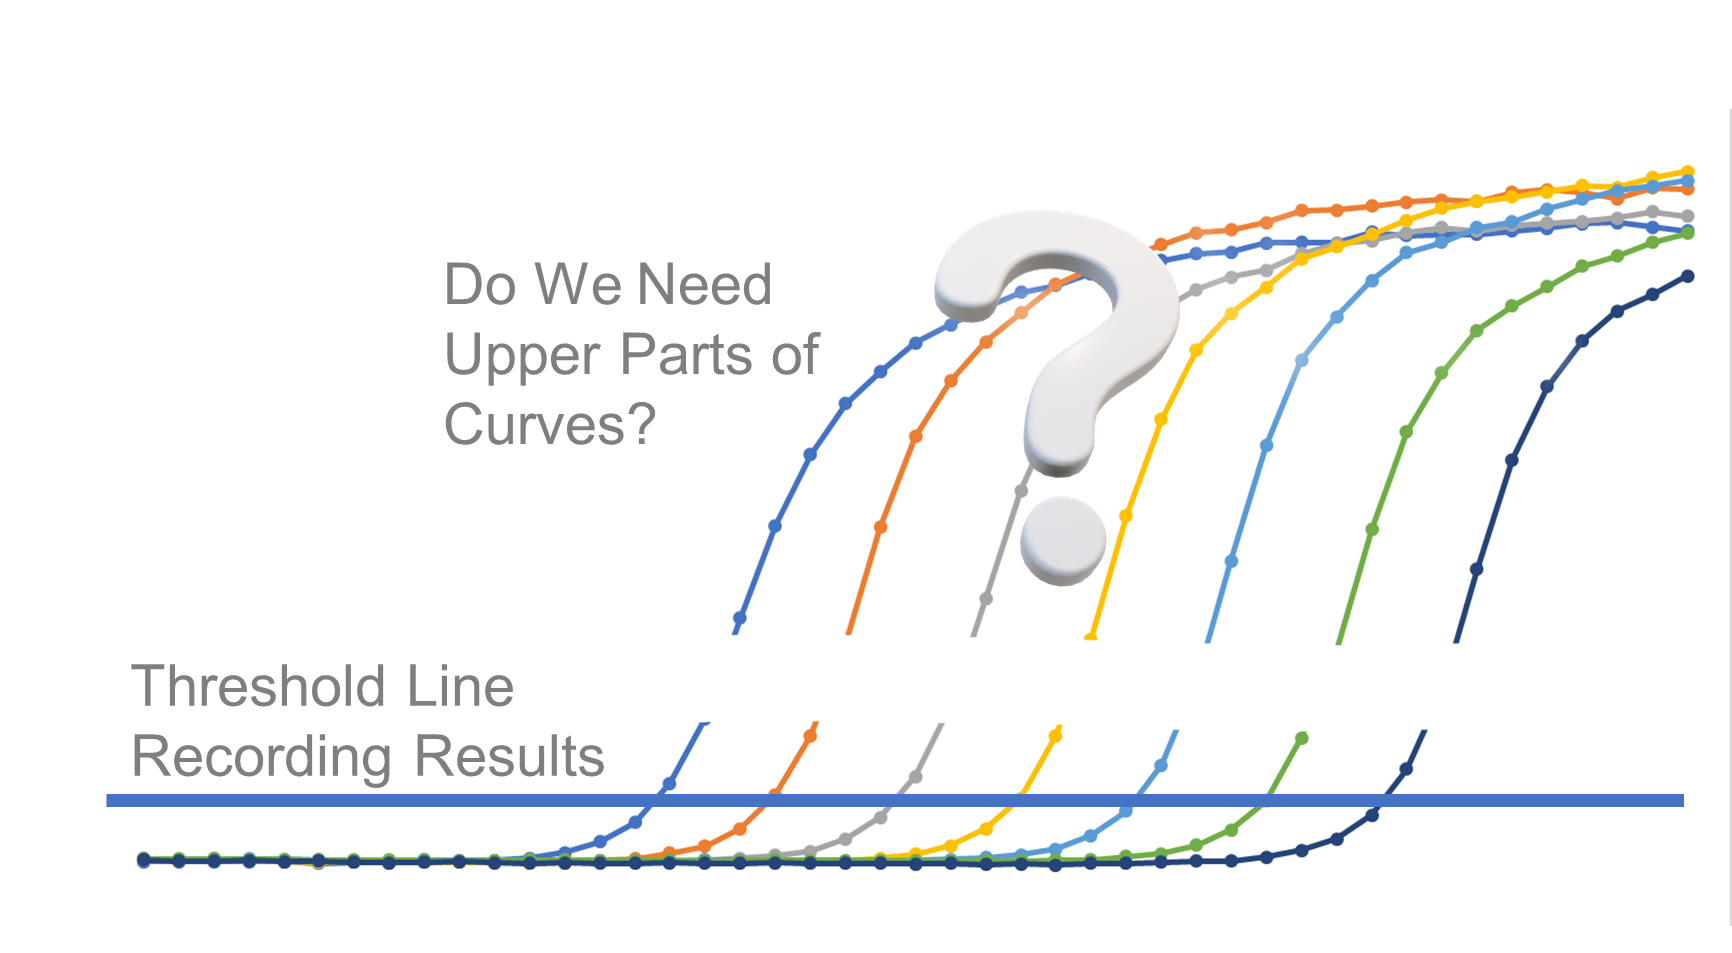


Figure 2: Real-time PCR quantification only requires the initial part of the amplification curves.


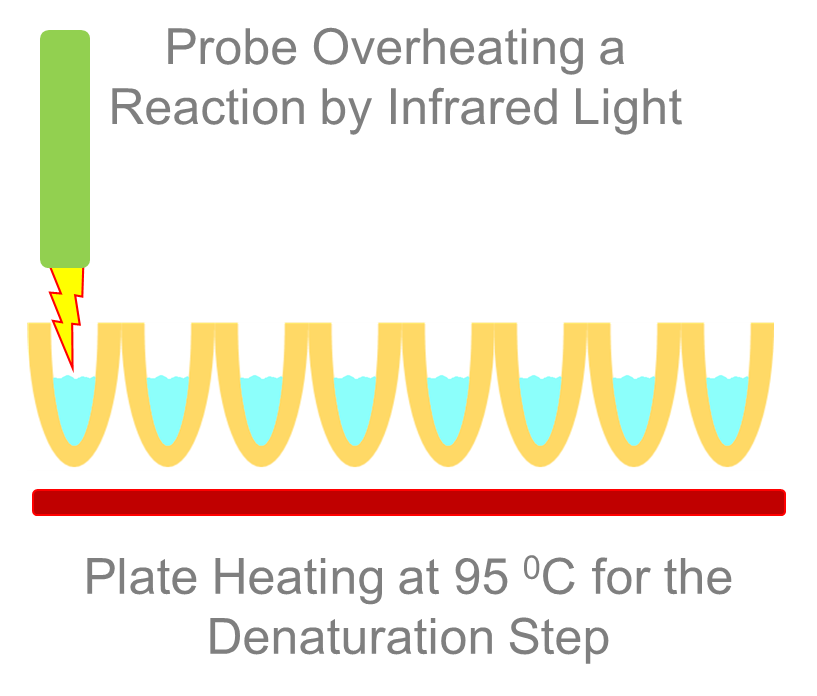


Figure 3: A possible model for OptiStop PCR
